# Supplementary material for: UCSC Genome Browser enters 20th year
Source: PubMed Central journal article supplement (PMC7145642; doi:10.1093/nar/gkz1012), 2019-11-06
Supplement: gkz1012_supplemental_file.pdf [file gkz1012_supplemental_file.pdf]

Supplementary Table 1. Assemblies added in the last year

| <b>Organism</b>       | <b>NCBI Accession</b> | <b>Provider</b>                                                                    | <b>UCSC Name</b> |
|-----------------------|-----------------------|------------------------------------------------------------------------------------|------------------|
| Cow                   | GCF_002263795.1       | USDA ARS                                                                           | bosTau9          |
| Horse                 | GCF_002863925.1       | University of Louisville                                                           | equCab3          |
| Baboon                | GCF_000264685.3       | Human Genome Sequencing Center                                                     | papAnu4          |
| Chinese Hamster Ovary | GCA_900186095.1       | Eagle Genomics Ltd                                                                 | criGriChoV2      |
| Cat                   | GCF_000181335.3       | Genome Sequencing Center (GSC) at Washington University (WashU) School of Medicine | felCat9          |
| Chicken               | GCF_000002315.5       | Genome Reference Consortium                                                        | galGal6          |
| Orangutan             | GCF_002880775.1       | University of Washington                                                           | ponAbe3          |
| Chimp                 | GCF_002880755.1       | University of Washington                                                           | panTro6          |
| Sheep                 | GCF_000298735.2       | International Sheep Genome Consortium                                              | oviAri4          |
| A. gambiae            | GCF_000005575.2       | The International Consortium for the Sequencing of Anopheles Genome                | anoGam3          |
| Garter Snake          | GCA_001077635.2       | The Genome Institute at Washington University School of Medicine (WUGSC)           | thaSir1          |

Supplementary Table 2. Annotation tracks added or updated within the last year.

**KEY:** N = new, NU = new & updated, U = updated, AU = automatically updated

| Track Name                       | New/Update Status | Human assemblies | Mouse assemblies | Other assemblies          |
|----------------------------------|-------------------|------------------|------------------|---------------------------|
| ENCODE TF Clusters               | N                 | hg38, hg19       |                  |                           |
| ENCODE TF ChIP                   | N                 | hg38, hg19       |                  |                           |
| GeneHancer                       | N                 | hg38, hg19       |                  |                           |
| RefSeq HGMD                      | N                 | hg38, hg19       |                  |                           |
| dbSNP 151                        | N                 | hg38, hg19       |                  |                           |
| HGMD Variants                    | U                 | hg38, hg19       |                  |                           |
| GDC Cancer                       | N                 | hg38             |                  |                           |
| GENCODE Genes v31, v29, v25      | N                 | hg38             |                  |                           |
| MANE Transcripts v0.6            | NU                | hg38             |                  |                           |
| sno/miRNA                        | NU                | hg38             |                  |                           |
| miRNA Tissue Atlas               | N                 | hg38             |                  |                           |
| RefSeq Diffs                     | N                 | hg38             |                  |                           |
| CRISPR All                       | N                 | hg19             |                  |                           |
| Mastermind Variants              | N                 | hg19             |                  |                           |
| DGV Gold Standard Variants       | N                 | hg19             |                  |                           |
| Tabula Muris                     | N                 |                  | mm10             |                           |
| GENCODE Genes (VM22, VM20, VM18) | N                 |                  | mm10             |                           |
| CRISPR 10K                       | N                 | hg38             |                  | galGal6, bosTau9, anoGam3 |
| 77-species Conservation          | N                 |                  |                  | galGal6                   |
| 123-species Conservation         | N                 |                  |                  | dm6                       |
| 135-species                      | N                 |                  |                  | ce11                      |

|                                            |    |                         |                         |                            |
|--------------------------------------------|----|-------------------------|-------------------------|----------------------------|
| Conservation                               |    |                         |                         |                            |
| Chains & Nets (for many assemblies)        | N  | various                 | various                 | various                    |
| Ensembl Genes v95                          | N  | various                 | various                 | various                    |
| Transmap v5                                | N  | various                 | various                 | various                    |
| GenBank Updates (RefSeq Genes, ESTs, RNAs) | AU | Most assemblies updated | Most assemblies updated | Most assemblies updated    |
| GRC Incident                               | AU | hg38, hg19              | mm10, mm9               | danRer10, danRer7, galGal5 |
| ClinVar Nucleotide Variants                | AU | hg38, hg19              |                         |                            |
| Gene Reviews                               | AU | hg38, hg19, hg18        |                         |                            |
| NHGRI Catalog of Published GWAS            | AU | hg38, hg19, hg18        |                         |                            |
| OMIM Genes & Phenotypes                    | AU | hg38, hg19, hg18        |                         |                            |
| ClinGen Research                           | AU | hg38, hg19              |                         |                            |
| ClinVar Variants                           | AU | hg38, hg19              |                         |                            |
| DECIPHER                                   | AU | hg19                    |                         |                            |
| LOVD                                       | AU | hg19                    |                         |                            |
